# Supplementary material
Source: publisher figshare collection journal article supplement (https://frontiersin.figshare.com/ndownloader/files/25304945)
Supplement: Supplementary file [file 25304945]

## Supplementary Material

### Supplementary Figure.1

A-E. Flow cytometric examination shows that hMSCs were positive for CD29,CD44 and CD90,and negative for CD34 and CD45. F-G. Adipogenesis, osteogenesis and chondrogenesis differentiation of hMSCs were conducted by oil red O staining (F),alizarin red staining (G) and toluidine blue staining (H), respectively.

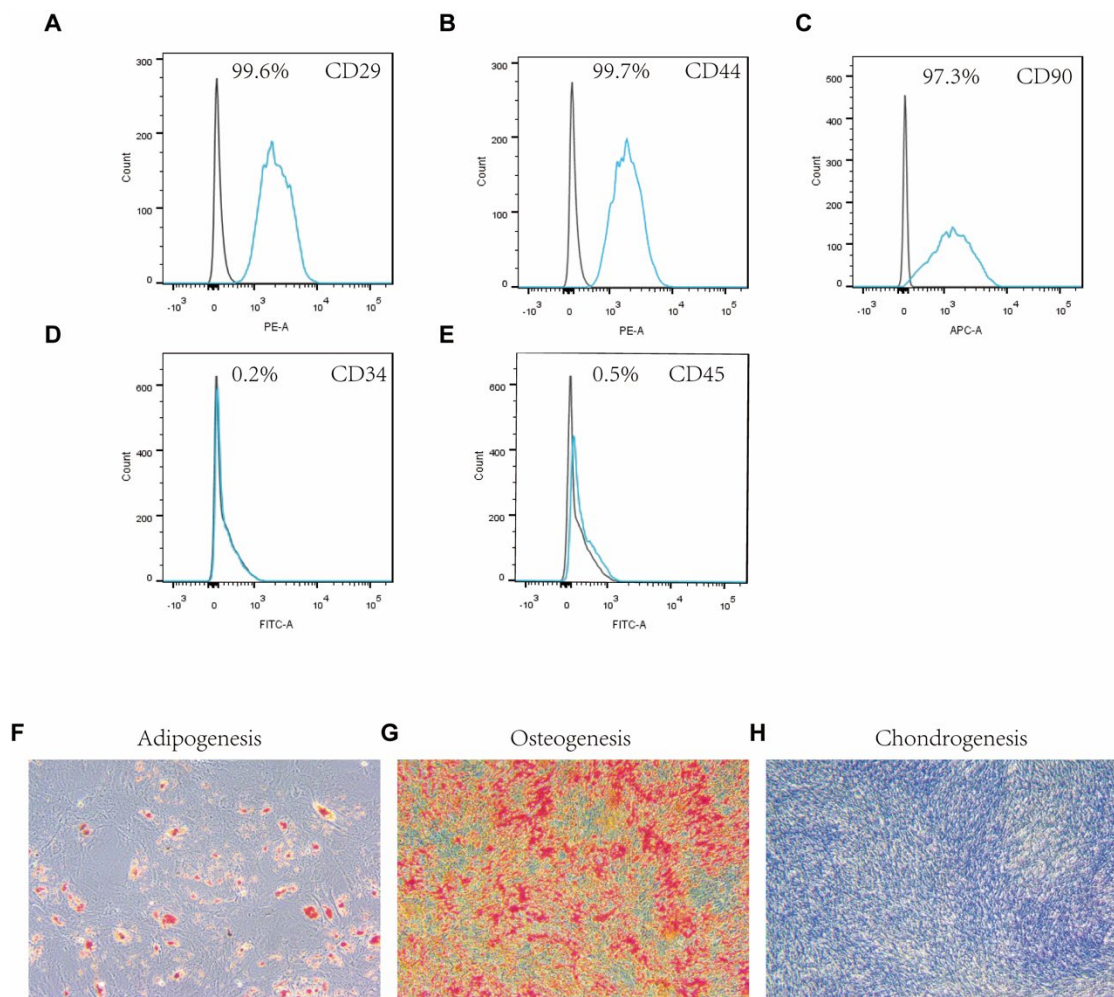

### Supplementary Figure.2

A.TPP1 expression between YMSCs and OMSCs B.TPP1-flag lentivirus overexpressed TPP1 expression in OMSCs. C.TPP1 siRNA decreased TPP1expression in YMSCs.

D.MRE11 and p-AKT expression of OMSCs in the normal condition.Data were shown as mean  $\pm$  S.D.\* P < 0.05. \*\*P < 0.01. \*\*\*\*P < 0.0001.

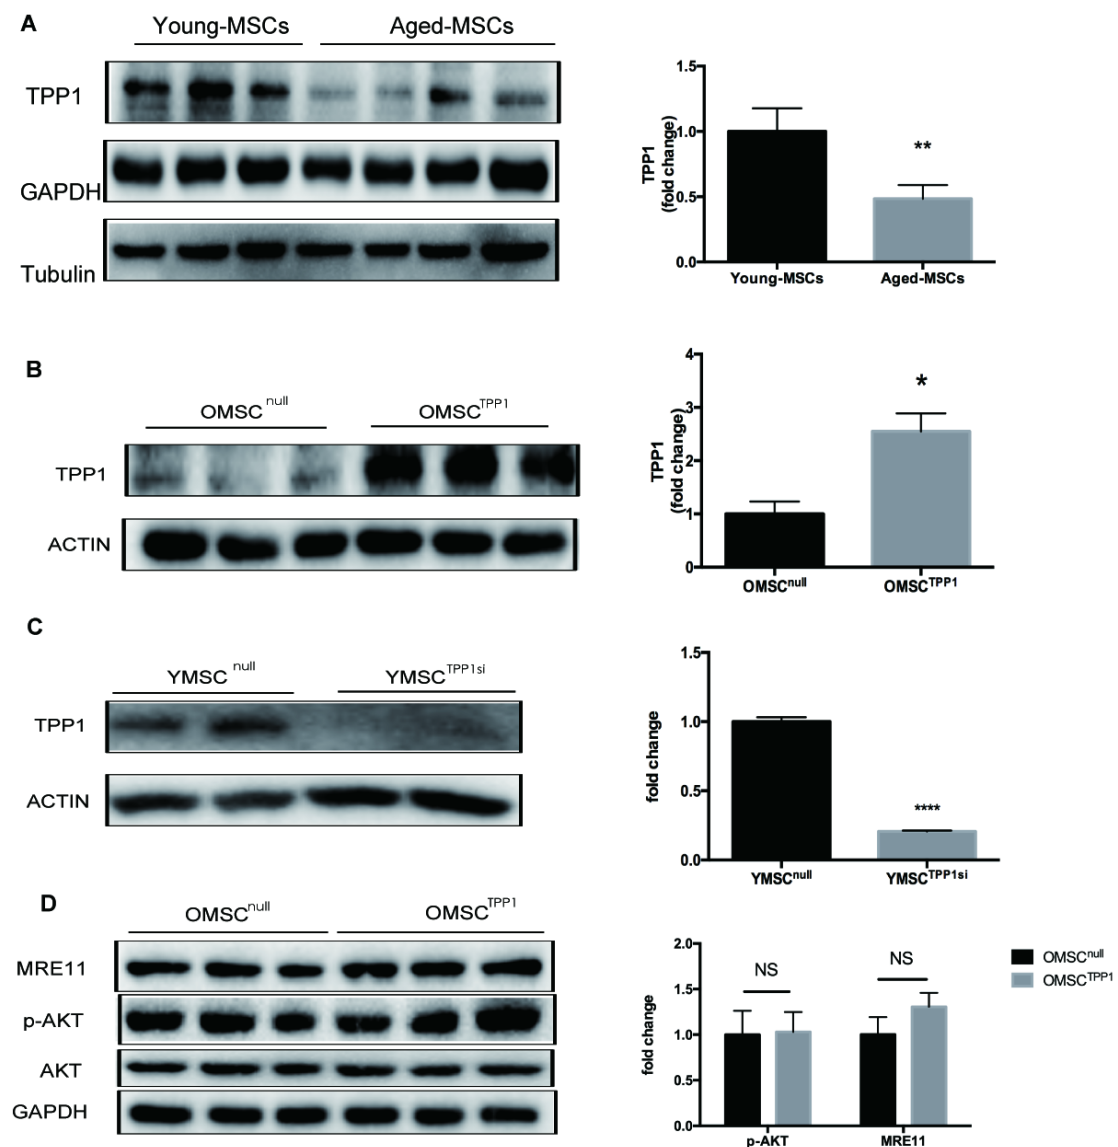

### Supplementary Figure.3

A-D Shelterin components and telomerase analysis of (A) POT1 and TIN2 protein expression (B) Quantification RNA expression of POT1,TIN2,TRF2,TRF1 and RAP1 (C)Quantification RNA expression of TERT (D) telomerase activity in TPP1 overexpressed OMSCs. Data were shown as mean  $\pm$  S.D.

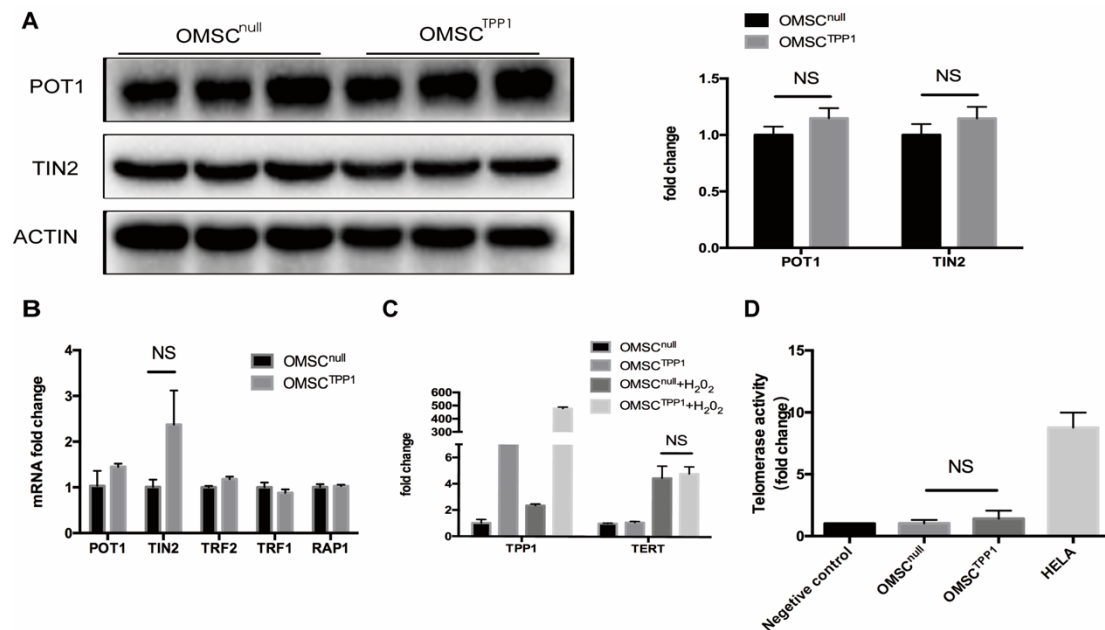

#### Supplementary Figure.4

A. Tube formation was performed using GFP-HUVECs cultured with conditioned medium collected from DMEM alone, OMSC<sup>null</sup> normal cultured DMEM, OMSC<sup>TPP1</sup> normal cultured DMEM, OMSC<sup>null</sup> OGD cultured DMEM and OMSC<sup>TPP1</sup> OGD cultured DMEM. The conditioned medium had been normalized by  $1 \times 10^6$  number of hMSCs. B. The quantification of tube formation in each group. n=3-6 wells in each group. C. D. The quantification and image of the apoptotic rate of H9C2 cardiomyocytes measured by Annexin APC/PI staining. E. Representative echocardiographic images at 7 days and 14 days after MI. F. Ejection fraction (EF) and Fraction shortening (FS), at days 7 and 14 after MI. Data were expressed as mean  $\pm$  S.D. \* P < 0.05. \*\*P < 0.01, \*\*\*P < 0.001

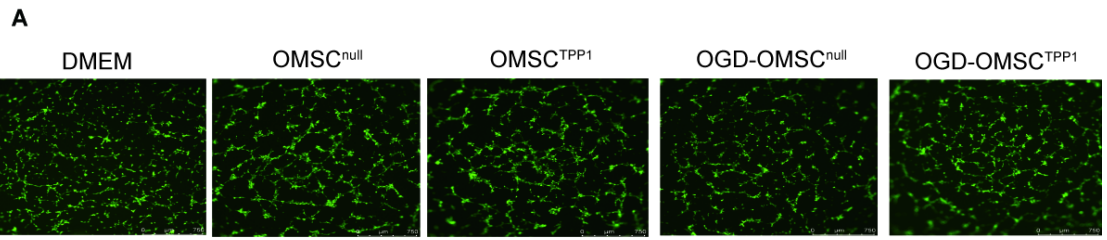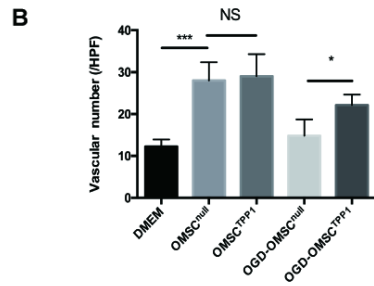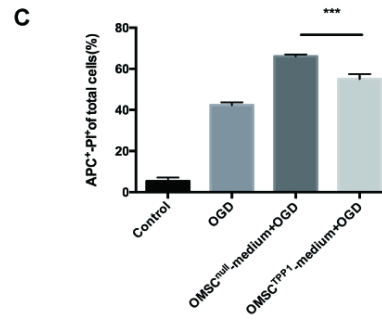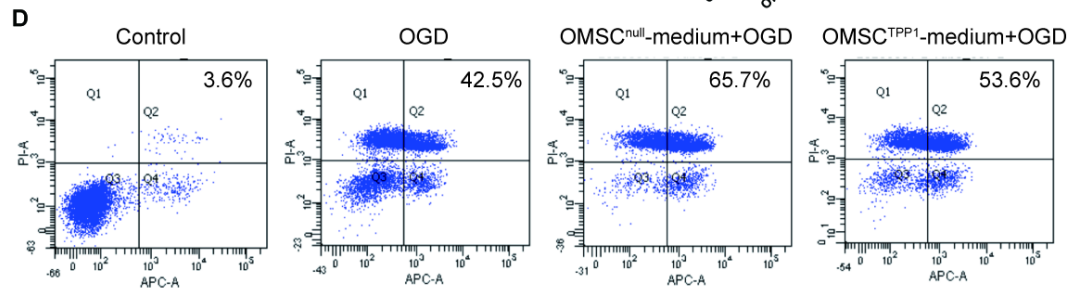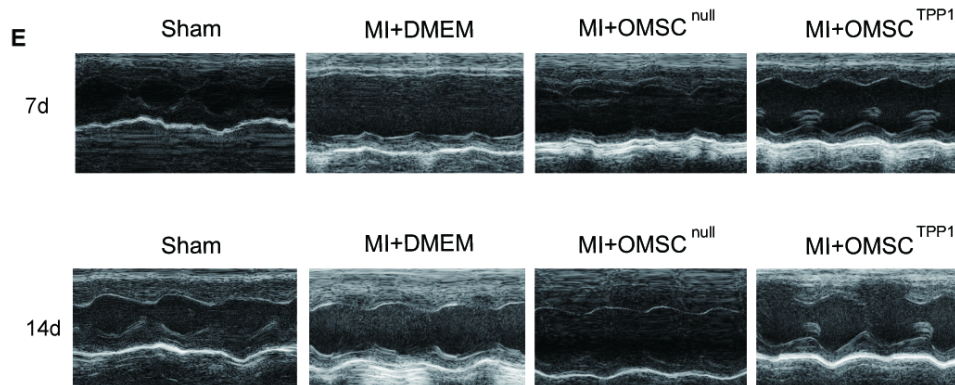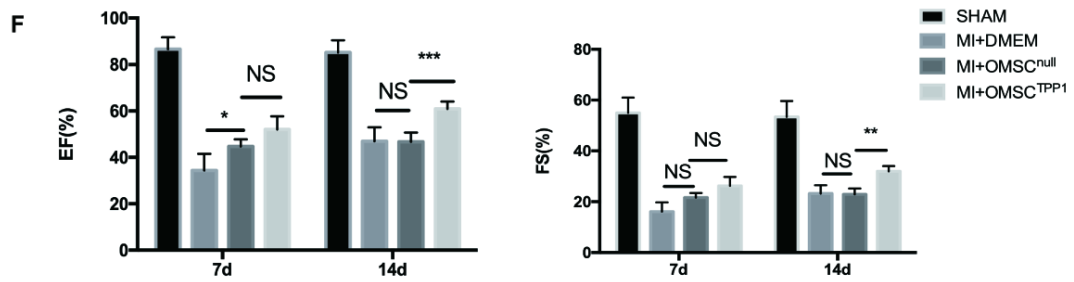

**Supplementary Table1 Primer list**

|             |                       |
|-------------|-----------------------|
| hum TPP1 F  | CCTGCTCTGTCTGGTATGAGT |
| hum TPP1 R  | GAGTGTGGAGCGGTATCTGT  |
| hum ACTIN F | CCCTGGAGAAGAGCTACGAG  |
| hum ACTIN R | CGTACAGGTCTTTGCGGATG  |
| hum TERT F  | CCTTCCGCCAGGTGTCC     |
| hum TERT R  | GGAGCCACCAGCACAAAGA   |
| hum POT1 F  | CGGCAGCAAGTTGTCAGATT  |
| hum POT1 R  | CTGGCTGTAGGGATCCGAAA  |
| hum TRF2 F  | AGCCACTTGTGACTCCATGA  |
| hum TRF2 R  | TAGCCCAGCAGATGTTGACA  |
| hum TRF1 F  | GGCTGACCTCAACCCTGTAA  |
| hum TRF1 R  | AAAATTAGCTGGGCGTGGTG  |
| hum TIN2 F  | CTGTGGATTTGGCCTCGAAG  |
| hum TIN2 R  | CCAGGCAAGAGAAGAGGTGA  |
| hum RAP1 F  | CCGCTAACATTGCTTCGACA  |
| hum RAP1 R  | TCTAGCACTTCACCACCGTT  |
